# Supplementary material
Source: publisher site journal article supplement (https://www.dovepress.com/article/285124)
Supplement: Supplementary file 1 [file get_supplementary_file.php]

**Supplementary Table 1. Physician-Reported Outcomes**

| **Outcome** | **Survey Question and Response Options** |
| --- | --- |
| **Current treatment modalities** | Calculated from responses to:  Is this patient currently prescribed drug treatment specifically for their OA, including if initiated today?  Have you ever discussed non-medical interventions (eg, weight loss, change of daily activities) with this patient for the management of their OA?  Which of the following suggestions have you made to the patient? Options were: lose weight; fitness/exercise regimen; physical/physiotherapy; avoidance of painful activities; therapeutic massage; acupuncture; TENS; cognitive behavior therapist/psychotherapist; occupational therapist, dietary supplements/home remedies; hypnosis; join patient groups/forums; using a walking stick/cane; using a walker; using a wheelchair; other (specify).  Options were: pharmaceutical treatment only; pharmaceutical and nonpharmaceutical treatments; nonpharmaceutical treatment; no treatment. |
| **Nonpharmacologic Treatment Modalities** | |
| **Ever recommended** | Have you ever discussed non-medical interventions (eg, weight loss, change of daily activities) with this patient for the management of their OA? |
| **Ever recommended by type** | Which of the following suggestions have you made to the patient?  Options were: lose weight; fitness/exercise regimen; physical/physiotherapy; avoidance of painful activities; therapeutic massage; acupuncture; TENS; cognitive behavior therapist/psychotherapist; occupational therapist, dietary supplements/home remedies; hypnosis; join patient groups/forums; using a walking stick/cane; using a walker; using a wheelchair; other (specify). |
| **Tried before drug treatment** | Did you discuss with the patient the option of trying a non-medical intervention before you prescribed them drug therapy?  Options were: Yes – I ensured the patient tried at least one non-drug intervention before I would prescribe them a therapy; Yes – I asked the patient to try a non-drug intervention alongside a prescription therapy; No – I prescribed a drug therapy straight away without discussing non-medical interventions. |
| **OTC Medications** | |
| **Currently recommended** | Have you recommended that the patient currently takes OTC medication for their OA? |
| **Currently recommended by type** | Please indicate which OTC medications (please write in products and not drug class).  Responses were categorized as: acetaminophen/paracetamol; ibuprofen; naproxen; glucosamine; other. |
| **Prescription Medications** | |
| **Currently prescribed** | Is this patient currently prescribed drug treatment specifically for their OA, including if initiated today? |
| **Currently prescribed by class** | Please complete the patient’s current treatment regimen.  Options were: no current treatment; no current treatment but has been previously prescribed; never been prescribed; non opioid/non-NSAID analgesic (acetaminophen, capsaicin); corticosteroids (intra-articular and oral use corticosteroid); NSAIDs (diclofenac, celecoxib, etoricoxib, naproxen, naproxen/esomeprazole); viscosupplements (hyaluronic acid); glycosaminoglycans (glucosamine, chondroitin); any opioid (categorized as strong opioid [morphine, oxycodone, fentanyl, tapentadol]; weak opioid [tramadol, codeine, buprenorphine, dihydrocodeine]; opioid and analgesic in a combined tablet [hydrocodone/acetaminophen]); other. |
| **Number of currently prescribed medications** | Calculated from response to: please complete the patient’s current treatment regimen.  Options were: 1; 2; 3+; no prescribed treatments. |
| **Prior prescription medications**  (presented together with current) | Please complete the patient’s previous treatment history, starting from previous regimen 1 and working backwards.  Options were as for current prescriptions. |
| **Number of previous therapy lines** | Including the patient’s current treatment regimen, how many different treatment regimens has this patient ever received specifically for their OA?  Options were: 1; 2; 3+ (combined 3, 4, >4). |
| **Duration of previous prescriptions** | Duration of regimen (weeks)? |
| **Main reason for switching to 2nd/3rd line therapy** | Please indicate the reasons for change from previous regimen 2 to previous regimen 1.  Please indicate the reasons why patients were changed from their previous to current drug regimen (or if not currently receiving a treatment, reasons why therapy was stopped).  Options were: lack of efficacy; poor patient compliance; inconvenient dosing frequency; drug interactions; tiredness/fatigue; constipation; nausea/vomiting; drowsiness; dizziness; difficulty concentrating; blurred vision; headaches; sleep problems/disturbances; dry mouth; worries about addiction; patient request; cheaper drug; insurance restrictions; patient out-of-pocket expense; formulary-driven; comorbidities; resource changes in the clinic/practice driven; treatment break; other. |

Abbreviations: NSAID, nonsteroidal anti-inflammatory drug; OA, osteoarthritis; OTC, over-the-counter; TENS, transcutaneous electrical nerve stimulation.
